# Supplementary material
Source: PubMed Central journal article supplement (PMC2577242)
Supplement: pp.108.125062_1.pdf [file pp.108.125062_1.pdf]

|                        |             |            |             |             |             |             |            |            |            |           |
|------------------------|-------------|------------|-------------|-------------|-------------|-------------|------------|------------|------------|-----------|
|                        | 1           |            |             |             | 50          |             |            |            | 100        |           |
| CsCCD1-Crocus          | MGEVAKELVE  | .....ER    | RSIVAVNPGP  | SKGLVSSAVD  | LLESAVYLYF  | FDKSKPCHYL  | SGNFAPVVE  | TPPCDLPVR  | GHLPECLNGE | FVRVGNPKF |
| ZmCCD1-Zea             | ~~~~~MDSHR  | .....ND    | GVVVVPAPRP  | RKGLASWALD  | LLESAAVRLG  | FDKTKPLHWL  | SGNFAPVVE  | TPPAPNLIVR | GHLPECLNGE | FVRVGNPKF |
| AtCCD1-Arabidopsis     | ~~~~~MAEKL  | .....DG    | SIIISVHPRP  | SKGFSSKLLD  | LLERLVVKLM  | HDASLPLHYL  | SGNFAPIRDE | TPPVKDLPVH | GHLPECLNGE | FVRVGNPKF |
| CmCCD1-Cucumis         | ~~~~~K      | QKLNGGLPG  | RSLVEVSEPK  | SKGLVSKATD  | LLEKLVFKLM  | YDSSKPQHLYL | SGNFAPVHDE | TPPIIDLVPK | GHLPECLNGE | FVRVGNPKF |
| RdCCD1-Rosa            | MAEVVEKRHD  | DDVKEKLKS  | NGIVVNPFPK  | SKGVSTLVLD  | TVEKLIVKLM  | YDSSQPHHLYL | AGNFAPVIE  | TPPTKDLHVI | GHLPECLNGE | FVRVGNPKF |
| <b>MtCCD1-Medicago</b> | ~~~~~MESEK  | .....IG    | GGIVKVEPKP  | SNGFTSKAVD  | LLEKLIIVKLF | YDSSLPHHHL  | AGNFAPVKDE | TPPIKDLPIK | GHLPECLNGE | FVRVGNPKF |
| PsCCD1-Pisum           | ~~~~~MGSEK  | .....EN    | GVILEVEPKP  | SNGFTSKAVD  | LLEKLIIVKLF | YDSSLPHHHL  | SGNFAPVKDE | TPPVKDLTVQ | GHLPECLNGE | FVRVGNPKF |
| PvCCD1-Phaseolus       | ~~~~~MGDDGK | KN...G.AE  | GGLVKVDPKP  | TNGFSSKVID  | LLEKLLVKFL  | YDSSLPHHLYL | TGNFGPVT.E | TPPTKDLVPK | GHLPECLNGE | FVRVGNPKF |
| CmCCD1-Castanea        | ~~~~~MAEEKQ | KLSGGGG.AG | GGIVAVDPKP  | NNGLTSKVID  | EVEKLVVKLM  | YDSSLPHHLYL | SGNFAPVREE | TPPTTDLIVK | GHLPECLNGE | FVRVGNPKF |
| VvCCD1-Vitis           | ~~~~~MAEKEE | Q.....GG   | AGVVVVDPKP  | SKGFTSKAVD  | WLEKLVVKLM  | YDSSQPLHLYL | SGNFAPVRDE | TPPCKNLPVI | GHLPECLNGE | FVRVGNPKF |
| CaCCD1-Coffea          | ~~~~~MGRQEG | EEVVEKIEGK | QEVVVVNPFPK | NNGFATAKLID | WLEKLVVKLM  | YDSSQPLHLYL | SGNFAPVDE  | TPPCKDLLVR | GHLPECLNGE | FVRVGNPKF |
| PhCCD1-Petunia         | ~~~~~MGRKES | ..DDGVERIE | GGVVVNPFPK  | KKGITAKAID  | LLEKVIIVKLM | YDSSKPLHLYL | SGNFAPTD.E | TPPLNDLPIK | GHLPECLNGE | FVRVGNPKF |
| SlCCD1A-Solanum        | ~~~~~MGRKE  | ..DDGVERIE | GGVVVNPFPK  | RRGITAKAID  | LLEWGIIVKLM | YDSSKPLHLYL | QGNFAPTD.E | TPPLNDLIVQ | GHLPECLNGE | FVRVGNPKF |
| SlCCD1B-Solanum        | ~~~~~MGMNE  | ..EDGVARIE | G.VVVVDPKP  | QNGVAAKAID  | WLEWAIIVKLM | NDSTKPLPFL  | QGNFAPTD.E | TPPLKNLPVI | GHLPECLNGE | FVRVGNPKF |

|                        |           |            |            |            |            |            |            |            |            |            |
|------------------------|-----------|------------|------------|------------|------------|------------|------------|------------|------------|------------|
|                        | 101       |            |            |            | 150        |            |            |            | 200        |            |
| CsCCD1-Crocus          | MFVAGYHWF | GDGMIHGMRI | KDGKATYASR | YVKTARLKQE | EYFEGPKFMK | IGDLKGFGL  | FMVQMQLLRA | KLKVIDVSYG | VGTGNTALIV | HHGKLALISE |
| ZmCCD1-Zea             | APVAGYHWF | GDGMIHAMRI | KDGKATYVSR | YVKTARLKQE | EYFGGAKFMK | IGDLKGFGL  | FMVQMQLRK  | KFEVLDFTYG | FGTANTALIV | HHGKLALISE |
| AtCCD1-Arabidopsis     | DAVAGYHWF | GDGMIHGRI  | KDGKATYVSR | YVKTARLKQE | EYFGAAKFMK | IGDLKGFGL  | LMVNIQQLRI | KLKILDNTYG | NGTANTALIV | HHGKLALISE |
| CmCCD1-Cucumis         | SPVAGYHWF | GDGMIHGLRI | KDGKATYVSR | YVRTSRLKQE | EYFGAAKFMK | IGDLKGFGL  | LMVNMQLLRA | KLKVIDVSYG | TGTGNTALIV | HHGKLALISE |
| RdCCD1-Rosa            | APVAGYHWF | GDGMIHGMRI | KDGKATYVSR | YVKTARLKQE | EYFGGAKFMK | VGDLKGLFGL | LMVYMQQLRA | KLKVIDVSYG | HGTGNTALIV | HHGKLALISE |
| <b>MtCCD1-Medicago</b> | APVAGYHWF | GDGMIHGLRI | KDGKATYVSR | FVKTARLKQE | EYFGGSKFMK | IGDLKGLFGL | LMVNMQLLRA | KLKVIDVSYG | HGTANTALIV | HHGKLALISE |
| PsCCD1-Pisum           | SPVAGYHWF | GDGMIHGLRI | KDGKATYVSR | FVKTARLKQE | EYFNGSKFMK | IGDLKGLFGL | LMVNMQLLRA | KLKVIDVSYG | HGTANTALIV | HHGKLALISE |
| PvCCD1-Phaseolus       | APVAGYHWF | GDGMIHGLRI | KDGKATYVSR | FVETSRLKQE | EYFGRSKFMK | IGDLKGLFGL | LMVNIHMLRI | KLKVIDVSYG | GTTANTALIV | HHGKLALISE |
| CmCCD1-Castanea        | SPVAGYHWF | GDGMIHGLRI | KNGKATYVSR | YVRTSRLKQE | EYFGGAKFMK | IGDLKGLFGL | LMVNMQILRI | KLKVIDVSYG | YGTANTAMVY | HHGKLALISE |
| VvCCD1-Vitis           | SPVAGYHWF | GDGMIHGLRI | KDGKATYVSR | YVRTSRLKQE | EYFGGAKFMR | IGDLKGLFGL | LMVNMQLLRA | KLKVIDVSYG | TGTGNTALIV | HHGKLALISE |
| CaCCD1-Coffea          | SPVAGYHWF | GDGMIHGLRI | KDGKATYVSR | YVKTARLKQE | EYFGGSKFMK | VGDLKGLYGL | FMVNMQILRA | KLKVIDVSYG | IGTANTALIV | HHGKLALISE |
| PhCCD1-Petunia         | APVAGYHWF | GDGMIHGLRI | KDGKATYVSR | YVRTSRLKQE | EYFEGAKFMK | IGDLKGLFGL | FTVYMQMLRA | KLKVIDVSYG | NGTANTALIV | HHGKLALISE |
| SlCCD1A-Solanum        | APVAGYHWF | GDGMIHGLRI | KDGKATYVSR | YVRTSRLKQE | EYFGGAKFMK | VGDLKGLFGL | FTVYMQMLRI | KLKVIDVSYG | NSTANTALIV | HHGKLALISE |
| SlCCD1B-Solanum        | APVAGYHWF | GDGMIHGLRI | KDGKATYVSR | FVRTSRLKQE | EYFGGAKFMK | IGDLKGLFGL | FSVYIYMLRE | KLKVIDVSYG | NGTANTALIV | HHGKLALISE |

|                        |            |            |            |            |            |             |            |            |            |             |
|------------------------|------------|------------|------------|------------|------------|-------------|------------|------------|------------|-------------|
|                        | 201        |            |            |            | 250        |             |            |            | 300        |             |
| CsCCD1-Crocus          | ADKPYVVKVL | EDGDLQTLGL | LDYDKRLSHS | FTAHPKVPDF | TDEMFTFGYA | HTEFPYVYTRV | ISKDGVMRDP | VPITIPASVM | MHDFAITENY | SIFMDLPLLYF |
| ZmCCD1-Zea             | ADKPYVVKVL | EDGDLQTLGL | LDYDKRLKHS | FTAHPKVPDF | TDEMFTFGYS | HEFPYCTYTRV | LNKEGAMLDP | VPITIPESVM | MHDFAITENY | SIFMDLPLLYF |
| AtCCD1-Arabidopsis     | ADKPYVIKVL | EDGDLQTLGL | IDYDKRLTHS | FTAHPKVPDV | TDEMFTFGYS | HTEFPYLYTRV | ISKDGIMHDP | VPITISEPIM | MHDFAITENY | AIFMDLPLLYF |
| CmCCD1-Cucumis         | GDKPYVIKVL | EDGDLQTLGL | LDYDKRLTHT | FTAHPKVPDF | TDEMFTFGYS | HTEFPYVYTRV | ISKDGLMHDP | VPITIPAPVM | MHDFAITENY | AIFMDLPLLYF |
| RdCCD1-Rosa            | GDKPYVVKVL | EDGDLQTLGL | LDYDKRLKHS | FTAHPKVPDF | TDEMFTFGYS | HTEFPYVYTRV | ISKDGFMDHP | VPITVPAPVM | MHDFAITENY | AIFMDLPLLYF |
| <b>MtCCD1-Medicago</b> | GDKPYAIKVF | EDGDLQTLGM | LDYDKRLGHN | FTAHPKVPDF | TDEMFTFGYS | HTEFPYIYTRV | ISKDGFMDHP | VPITISEPIM | MHDFAITENY | SIFMDLPLLYF |
| PsCCD1-Pisum           | GDKPYAIKVF | EDGDLQTLGM | LDYDKRLGHN | FTAHPKVPDF | TDEMFTFGYS | HTEFPYVYTRV | ISKDGFMDHP | VPITISDPVM | MHDFAITENY | SIFMDLPLLYF |
| PvCCD1-Phaseolus       | ADKPYAIKVF | EDGDLQTLGM | LDYDKRLGHS | FTAHPKVPDF | TDEMFTFGYA | HTEFPYIYTRV | ISKDGYMHDP | VPITISDPIM | MHDFAITENY | AVFMDLPLLYF |
| CmCCD1-Castanea        | ADKPYAVKVL | EDGDLQTLGM | LDYDKRLSHS | FTAHPKVPDF | TDEMFTFGYS | HTEFPYIYTRV | ISKDGFMDHP | VPITISDPIM | MHDFAITENY | AIFMDLPLLYF |
| VvCCD1-Vitis           | ADKPYVVKVL | EDGDLQTLGM | LDYDKRLTHS | FTAHPKVPDF | TDEMFTFGYS | HTEFPYIYTRV | ISKDGFMDHP | VPITISDPIM | MHDFAITENY | AIFMDLPLLYF |
| CaCCD1-Coffea          | ADKPYVLRVL | EDGDLQTLGL | LDYDKRLTHS | FTAHPKVPDF | TDEMFTFGYS | HTEFPYIYTRV | ISKDGFMDHP | VPITISDPIM | MHDFAITENY | AIFMDLPLLYF |
| PhCCD1-Petunia         | ADKPYALKVL | EDGDLQTLGM | LDYDKRLKHS | FTAHPKVPDV | TDEMFTFGYA | HTEFPYIYTRV | ISKDGFMDHP | VPITISDPIM | MHDFAITENY | AIFMDLPLLYF |
| SlCCD1A-Solanum        | ADKPYALKVL | EDGDLQTLGM | LDYDKRLTHS | FTAHPKVDV  | TDEMFTFGYA | HTEFPYIYTRV | ISKDGFMDHP | VPITISDPIM | MHDFAITENY | AIFMDLPLLYF |
| SlCCD1B-Solanum        | GDKPYVVKVL | EDGDLQTLGM | LDYDKRLKHS | FTAHPKVPDV | TDEMFTFGYS | QTEFPYIYTRV | ISKDGFMDHP | VPITIPASVM | MHDFAITENY | AIFMDLPLLYF |

|                        |            |            |            |            |            |             |           |            |            |            |
|------------------------|------------|------------|------------|------------|------------|-------------|-----------|------------|------------|------------|
|                        | 301        |            |            |            | 350        |             |           |            | 400        |            |
| CsCCD1-Crocus          | QPKEMVKGGR | LIFSFDATKK | ARFGVLPRYA | KDDSLIRWFE | LPNCFIFHNA | NAWEEGDEVV  | LITCRLNPD | LDMVNGAVKE | KLEN.FKNEL | YEMRFNMKTG |
| ZmCCD1-Zea             | RPKEMVKNGE | FIYKFDPTKK | GRFGILPRYA | KDDKLIWRFQ | LPNCFIFHNA | NAWEEGDEVV  | LITCRLNPD | LDKVNQYQSD | KLEN.FGNEL | YEMRFNMKTG |
| AtCCD1-Arabidopsis     | RPKEMVKEKK | MIYSFDPTKK | ARFGVLPRYA | KDELMIRWFE | LPNCFIFHNA | NAWEEDEDEVV | LITCRLNPD | LDMVSGKVKE | KLEN.FGNEL | YEMRFNMKTG |
| CmCCD1-Cucumis         | KPKEMVKENK | LIFTFDATKK | ARFGVLPRYA | KDDLITQWFE | LPNCFIFHNA | NAWEEGDELV  | LITCRLNPD | LDMVSGSVKE | KLEN.FSNEL | YEMRFNMKSG |
| RdCCD1-Rosa            | RPKEMVKEGK | LIFSFDPTKK | ARFGVLPRYA | KDDLIRWFE  | LPNCFIFHNA | NAWEEDEDEVV | LITCRLNPD | LDMVNGPIKK | KLDN.FKNEL | YEMRFNMKTG |
| <b>MtCCD1-Medicago</b> | RPKEMVKNKT | LIFSFDSTKK | ARFGVLPRYA | KDEKHIRWFE | LPNCFIFHNA | NAWEEDEEIV  | LITCRLNPN | LDMVGGAVKE | KLDN.FANEL | YEMRFNMKTG |
| PsCCD1-Pisum           | RPKEMVKNKT | LIFSFDSTKK | ARFGVLPRYA | KDDKHIRWFE | LPNCFIFHNA | NAWEEDEEIV  | LITCRLNPN | LDVVGAVKE  | KLDN.FSNEL | YEMRFNMKTG |
| PvCCD1-Phaseolus       | RPKEMVKNKT | LIFSFDSTKK | ARFGVLPRYA | KDEQHIRWFE | LPNCFIFHNA | NAWEEDEDEVV | LITCRLQNP | LDNVGGTVQE | KLEN.FSNEL | YEMRFNMKTG |
| CmCCD1-Castanea        | RPKEMVKGK  | LIFTFDATKN | ARFGVLPRYA | KDELQIRWFE | LPNCFIFHNA | NAWEEDEDEVV | LITCRLQNP | LDMVNGVKE  | KLEN.FINEL | YEMRFNMKTG |
| VvCCD1-Vitis           | RPKEMVKEKK | LIFTFDATKK | ARFGVLPRYA | KNELHIKWF  | LPNCFIFHNA | NAWEEDEDEVV | LITCRLNPD | LDLVGGDVKE | KLEN.FGNEL | YEMRFNMKTG |
| CaCCD1-Coffea          | RPKEMVKDKK | LIFTFDPTKK | ARFGVLPRYA | KNDALIKWF  | LPNCFIFHNA | NAWEEGDEVI  | LITCRLQNP | LDMVSGIVK  | KLEN.FSNEL | YEMRFNMKTG |
| PhCCD1-Petunia         | RPKEMVKNQ  | LAFTFDPTKK | ARFGVLPRYA | KSEALIRWFE | LPNCFIFHNA | NAWEEGDEVV  | LITCRLPHD | LDMVNGEVKE | NLEN.FSNEL | YEMRFNMKSG |
| SlCCD1A-Solanum        | RPKEMVKNK  | LAFTFDATKK | ARFGVLPRYA | NNEALIRWFE | LPNCFIFHNA | NAWEEGDEVV  | LITCRLVNP | LDMVNGAVKE | KLEN.FCNEL | YEMRFNMKSG |
| SlCCD1B-Solanum        | RPKEMVKNKQ | LAYSFDPTKK | ARFGVLPRYA | KNESLIKWF  | LPNCFIFHNA | NAWEEGDDVV  | LITCRLQNP | LDAIKGTEKE | EQRDGFINEL | YEMRFNMKNG |

|                        |            |            |            |            |            |            |            |            |            |            |
|------------------------|------------|------------|------------|------------|------------|------------|------------|------------|------------|------------|
|                        | 401        |            |            |            | 450        |            |            |            | 500        |            |
| CsCCD1-Crocus          | AASQKQLSVS | AVDFPRINES | YTTRKQRYVY | GTILNITKV  | KGIIKFDLHA | EPEAGKKKLE | VGGNVQGI   | LGFGRYGSEA | VFVPRERGIK | SEEDDGYLIF |
| ZmCCD1-Zea             | AASQKQLSVS | AVDFPRINES | YTGRKQRYVY | CTILDSIAKV | TGIIKFDLHA | EPESGVKLE  | VGGNVQGIYD | LGFGRFGSEA | IFVPKHPGVS | GEEDDGYLIF |
| AtCCD1-Arabidopsis     | SASQKQLSAS | AVDFPRINEC | YTGKKQRYVY | GTILDSIAKV | TGIIKFDLHA | EAEAGKRMLE | VGGNIKGIYD | LGEGRYGSEA | IYVPRETAE. | ..EDDGYLIF |
| CmCCD1-Cucumis         | LASQKQLSES | AVDFPRINES | YTGRKQRYVY | GTILDSIAKV | TGIAKFDLHA | EPETGKTKIE | VGGNVQGLYD | LGFGRFGSEA | IFVPRVPGIT | SEEDDGYLIL |
| RdCCD1-Rosa            | LATQKQLSES | AVDFPRINES | YTGRKQRYVY | GTILDSIAKV | TGIVKFDLHA | APETGKTKIE | VGGNVQGLYD | LGFGRFGSEA | IFVPRVPGIT | SEEDDGYLIF |
| <b>MtCCD1-Medicago</b> | EASQKQLSAS | AVDFPRINES | YTGRKQRYVY | GTELDIAKV  | TGIVKFDLHA | KPDSGKTKLE | VGGNVVGHYD | LGFGRFGSEA | VYVPRVPGTD | SEEDDGYLIF |
| PsCCD1-Pisum           | EASQKQLSAS | TVDFPRINES | YTGRKQRYVY | GTILDSIAKV | TGIIKFDLHA | EPDSGKTKLE | VGGNVQGLYD | LGFGRFGSEA | VYVPRVPGTD | SEEDDGYLIF |
| PvCCD1-Phaseolus       | EASQKQLSAS | TVDFPRINEN | YTGRKQRYVY | GTILDSIAKV | TGIIKFDLHA | EPDHGKTKLE | VGGNVQGLYD | LGFGKFGSEA | VYVPRVPGIE | SEEDDGYLVL |
| CmCCD1-Castanea        | LASQKQLSAS | AVDFPRINES | YTGRKQRYVY | GTILDSIAKV | TGIIKFDLHA | EPDTGKTKLE | VGGNVLGIYD | LGFGRFGSEA | VFVPRVPGIT | SEEDDGYLIF |
| VvCCD1-Vitis           | IASQKQLSAS | SVDFPRINES | YTGRKQRYVY | GTILDSIAKV | TGIIKFDLHA | EPDTGKSKLE | VGGNVQGI   | LGVGRFGSEA | VFVPREPGIT | SEEDDGYLIF |
| CaCCD1-Coffea          | LASQKQLSES | AVDFPRINES | YTGRKQRYVY | GTILDSIAKV | TGIAKFDLHA | EPETGKTKIE | VGGNVQGVFD | LGFGRFGSEA | IFVPRVPGIT | SEEDDGYLIF |
| PhCCD1-Petunia         | AASQKQLSES | SVDFPRINEN | YTGRKQRYVY | GTILNSIAKV | TGIIKFDLHA | EPETGKQLE  | VGGNVQGI   | LGFGRFGSEA | VFVPSQPGTE | CEEDDGYLIF |
| SlCCD1A-Solanum        | AASQKQLSES | AVDFPRINEN | YTGRKQRYVY | GTILNSIAKV | TGVIKFDLHA | EPETGKSQLE | VGGNVQGI   | LGFGRFGSEA | VFVPSRPGTE | REEDDGYLIF |
| SlCCD1B-Solanum        | VASQKQLSEA | AVDFPRINEN | YTGGKQRYVY | GTILNVAQI  | TGVVKFDLHA | EPETGKTKLE | VGGNVPGIFD | LGFGRFGSEA | IFVPRVPGTE | CEEDDGYLIL |

|                        |            |            |            |           |            |       |
|------------------------|------------|------------|------------|-----------|------------|-------|
|                        | 501        |            |            |           | 550        |       |
| CsCCD1-Crocus          | FVHDENTGKS | EVNVIDAKTM | SAEPVAVVEL | PNRVPGFHA | FFVTEEQLOW | QQTDV |
| ZmCCD1-Zea             | FVHDENTGKS | EVNVIDAKTM | SADPVAVVEL | PNRVPGFHA | FFVTEEQLAR | QAEQ  |
| AtCCD1-Arabidopsis     | FVHDENTGKS | CVTVIDAKTM | SAEPVAVVEL | PHRVPGFHA | FFVTEEQLOE | QTLI~ |
| CmCCD1-Cucumis         | FVHDENTGKS | AVNVDAKTM  | SSEPVAVVEL | PHRVPGFHA | FFVTEEQLOE | QGR~  |
| RdCCD1-Rosa            | FVHDENTGKS | AIHVLDAKTM | SGDPVAVVEL | PHRVPGFHA | FFVTEEQLOE | QAKF~ |
| <b>MtCCD1-Medicago</b> | FVHDENTGKS | FVHVLDAKTM | SADPVAVVEL | PORVPGFHA | FFVTEEQLOE | QAKL~ |
| PsCCD1-Pisum           | FVHDENTGKS | FVHVLDAKRM | SAEPVAVVEL | PORVPGFHA | FFVTEEQLOE | QAKF~ |
| PvCCD1-Phaseolus       | FVHDENAGKS | FVHVLDAKTM | SADPVAVVEL | PNRVPGFHA | FFVTEEQLOE | QAKL~ |
| CmCCD1-Castanea        | FAHDENTGKS | SVNVIDAKTM | SPDPVAVVEL | PKRVPGFHA | FFVTEEQLOE | QGR~  |
| VvCCD1-Vitis           | FVHDEKTGKS | YVNVIDAKTM | SPDPVAVVEL | PNRVPGFHA | FFVTEEQLOE | QAKL~ |
| CaCCD1-Coffea          | FVHDESTGKS | AVNVDAKTL  | SADPVAVVEL | PNRVPGFHA | FFVTEEQLEE | QAKL~ |
| PhCCD1-Petunia         | FVHDENTGKS | AVNVDAKTM  | SAEPVAVVEL | PKRVPGFHA | FFVTEEQIQE | QAKL~ |
| SlCCD1A-Solanum        | FVHDENTGKS | AVNVDAKTM  | SAEPVAVVEL | PKRVPGFHA | FFVTEEQIQE | QAKL~ |
| SlCCD1B-Solanum        | FVHDENTGKS | SVNVIDAKTM | SAEPVAVVEL | PKRVPGFHA | FFVTEEQIQE | QAKM~ |
